# Supplementary material for: Predictability in evolution: Adaptation of the Bonaire anole (Anolis bonairensis) to an extreme environment
Source: PLoS One. 2017 May 1;12(5):e0176434. doi: 10.1371/journal.pone.0176434 (PMC5411080; doi:10.1371/journal.pone.0176434)
Supplement: S2 File — (XLSX) [file pone.0176434.s005.xlsx]

## Sheet: Sheet1
Bonairensis individuals data
Site	Ventrals	Dorsals	%R	%Green	%Blue	Achromaticity		Chevron intensity
5	61	85	40.8602	32.6165	26.5233	84.9496		3
5	69	85	38.2716	32.9218	28.8066	90.1268		3
5	65	83	33.4906	35.8491	30.6604	94.6508		3
5	69	87	37.4	33	29.6	91.87		3
5	62	79	38.3442	33.3333	28.3224	89.9749		3
6	56	74	35.503	33.1361	31.3609	95.6641		3
6	65	100	33.672	33.2366	33.0914	99.326		3
6	60	80	34.6049	33.2425	32.1526	97.4602		2
6	57	77	36.1371	34.2679	29.595	92.52		3
6	52	68	38.1148	33.1967	28.6885	90.4405		3
9	59	81	38.2796	33.1183	28.6022	90.1109		3
9	62	75	35.8639	33.2461	30.8901	94.9423		3
9	62	75	40	33	27	86.67		3
9	69	101	35.7542	33.3333	30.9125	95.155		3
9	62	84	36.4807	33.0472	30.4721	93.7086		3
9	68	85	36.2069	33.2759	30.5172	94.2562		3
9	64	87	37.0119	32.0883	30.8998	92.6462		3
9	59	68	34.6296	33.3333	32.037	97.4041		3
9	62	80	36.6667	33.3333	30	93.33		3
9	56	80	36.0082	33.3333	30.6584	94.6469		3
9	58	68	35.049	33.3333	31.6176	96.5653		3
9	56	67	33.6463	33.3333	33.0203	99.3707		3
Chevron intensity means (Fig2D)			See Thorpe et al 2015 Appendices for other data from Lesser Antilles species
Species	PC1	Chev
NW Mart roquet	-0.29	0.9
	-0.51	1.5
	-0.6	2
	-0.68	0.95
	1.37	0
	1.78	0
	1.1	0
	1.91	0
Central Mart roquet	0.82	0
	1.6	0
	-0.63	1
	-0.38	0.95
Luciae	0.41	0
	0.88	0
	-0.38	0.39
aeneus	-0.46	0.6
	0.38	0.33
	-0.53	0.6
	0.22	0.26
bonairensis	-3.78732	3
	-3.4476	2.8
	-3.70226	3
Ventral scale number individuals (Fig 2E)
Species		NW Martinique roquet				NW Martinique roquet					Central Martinique roquet				richardii
	PC1	Site	Ventrals		PC1	Site	Ventrals			PC1	Site	Ventrals		PC1	Site	Ventrals
	-0.29	1	73		1.37	5	66			0.82	1	82		-0.46	1	78
	-0.29	1	76		1.37	5	69			0.82	1	89		-0.46	1	81
	-0.29	1	69		1.37	5	72			0.82	1	76		-0.46	1	75
	-0.29	1	70		1.37	5	70			0.82	1	74		-0.46	1	79
	-0.29	1	67		1.37	5	73			0.82	1	81		-0.46	1	89
	-0.29	1	62		1.37	5	77			0.82	1	67		-0.46	1	80
	-0.29	1	63		1.37	5	76			0.82	1	79		-0.46	1	80
	-0.29	1	72		1.37	5	71			0.82	1	80		-0.46	1	80
	-0.29	1	66		1.37	5	70			0.82	1	80		-0.46	1	74
	-0.29	1	74		1.37	5	77			0.82	1	78		0.38	2	83
	-0.51	2	75		1.78	6	77			1.6	2	88		0.38	2	85
	-0.51	2	60		1.78	6	79			1.6	2	79		0.38	2	89
	-0.51	2	68		1.78	6	77			1.6	2	81		0.38	2	95
	-0.51	2	64		1.78	6	82			1.6	2	84		0.38	2	76
	-0.51	2	62		1.78	6	81			1.6	2	86		0.38	2	90
	-0.51	2	71		1.78	6	75			1.6	2	82		0.38	2	84
	-0.51	2	65		1.78	6	75			1.6	2	86		0.38	2	86
	-0.51	2	62		1.78	6	83			1.6	2	82		0.38	2	99
	-0.6	3	75		1.78	6	83			1.6	2	81		0.38	2	98
	-0.6	3	77		1.78	6	81			-0.63	3	63		0.38	2	101
	-0.6	3	73		1.1	7	82			-0.63	3	63		0.38	2	90
	-0.6	3	76		1.1	7	83			-0.63	3	63		0.38	2	95
	-0.6	3	74		1.1	7	80			-0.63	3	64		-0.53	18	83
	-0.6	3	63		1.1	7	84			-0.63	3	69		-0.53	18	75
	-0.6	3	60		1.1	7	73			-0.63	3	68		-0.53	18	87
	-0.6	3	71		1.1	7	79			-0.63	3	64		-0.53	18	79
	-0.6	3	72		1.1	7	79			-0.63	3	67		-0.53	18	78
	-0.6	3	74		1.1	7	83			-0.63	3	65		-0.53	18	85
	-0.68	4	78		1.1	7	78			-0.63	3	63		-0.53	18	81
	-0.68	4	77		1.91	8	70			-0.38	4	65		-0.53	18	90
	-0.68	4	69		1.91	8	84			-0.38	4	56		-0.53	18	82
	-0.68	4	81		1.91	8	76			-0.38	4	68		-0.53	18	87
	-0.68	4	68		1.91	8	79			-0.38	4	60		0.22	22	80
	-0.68	4	70		1.91	8	76			-0.38	4	56		0.22	22	81
	-0.68	4	74		1.91	8	74			-0.38	4	60		0.22	22	94
	-0.68	4	72		1.91	8	78			-0.38	4	64		0.22	22	87
	-0.68	4	69		1.91	8	79			-0.38	4	68		0.22	22	88
	-0.68	4	68		1.91	8	91			-0.38	4	69		0.22	22	87
										-0.38	4	60		0.22	22	88
														0.22	22	91
														0.22	22	89
